# Supplementary material for: A Tale of Two Urgent Food System Challenges: Comparative Analysis of Approaches to Reduce High-Meat Diets and Wasted Food as Covered in U.S. Newspapers
Source: MDPI journal article supplement (doi:10.3390/su141912083), 2022-09-24
Supplement: s1 [file s1]

## **Supplementary Material:** List of codes

### 1. Descriptive variables and coder information

Article ID number

Title

Date

Publication

Author

Article type: news, letter, opinion piece, lifestyle (health/sustainability), other

Main focus of the article: food loss and waste, dietary shift, health, sustainability of agriculture/food production, hunger, general sustainability, industry developments

Initials of coder

### 2. Food loss and waste (FLW)

Does the article make only a passing reference to food loss and waste? If yes, no further codes given in this section.

Dominant framing of article regarding food loss and waste:

Diagnostic: identifies the problem/issue, may place blame

Symptomatic: identifies the consequences or why an issue is a problem

Prognostic: includes a proposed solution or at least a “plan of attack”

Motivational: presents reasons why people should be concerned and take action

Dismissive: minimizes or dismisses problem/issue and/or the consequences

Strategies to address FLW regarding food recovery hierarchy: prevention of food waste, divert food to feed other people, divert food to feed livestock, divert food from landfill

Strategies to address issue:

Development or adoption of infrastructure, including moving food with workers/volunteers

Development or adoption of product, technology, or process

Collect data to monitor issue and/or impacts

Raise awareness

Individual behavior change

Marketing

Incentives

Rules

Investment

Pledge/goal

Change food environment

Other

Strategies to address issue by food system stage: production, distribution/storage, processing/packaging, market/retail, consumers, other

Stakeholder participating or identified as responsible:

Local or state government

Federal government

Researchers

Non-profit organizations

Private funders/investors/private companies that don't fit elsewhere

Farmers and farmer organizations

Food/agricultural and food service corporations  
Food processors  
Retailers  
Consumers  
Other

### 3. Dietary shifts

Does the article make only a passing reference to dietary shifts? If yes, no further codes given in this section.

Dominant framing of article regarding diet shifts:

Diagnostic: identifies the problem/issue, may place blame

Symptomatic: identifies the consequences or why an issue is a problem

Prognostic: includes a proposed solution or at least a “plan of attack”

Motivational: presents reasons why people should be concerned and take action

Dismissive: minimizes or dismisses problem/issue and/or the consequences

Strategies to address issue:

Development or adoption of infrastructure, including moving food with workers/volunteers

Development or adoption of product, technology, or process

Collect data to monitor issue and/or impacts

Raise awareness

Individual behavior change

Marketing

Incentives

Rules

Investment

Pledge/goal

Change food environment

Other

Strategies to address issue by food system stage: production, distribution/storage, processing/packaging, market/retail, consumers, other

Stakeholder participating or identified as responsible:

Local or state government

Federal government

Researchers

Non-profit organizations

Private funders/investors/private companies that don't fit elsewhere

Farmers and farmer organizations

Food/agricultural and food service corporations

Food processors

Retailers

Consumers

Other
